# Supplementary material for: Adolescent development of multiscale structural wiring and functional interactions in the human connectome
Source: PubMed Central journal article supplement — Proc Natl Acad Sci U S A. 2022 Jul 1;119(27):e2116673119. doi: 10.1073/pnas.2116673119 (PMC9271154; doi:10.1073/pnas.2116673119), 2022-07-01
Supplement: pnas.2116673119.sapp.pdf [file pnas.2116673119.sapp.pdf]

## **Supplementary Information for**

Adolescent development of multiscale structural wiring and functional interactions in the human connectome.

Bo-yong Park, Casey Paquola, Richard A. I. Bethlehem, Oualid Benkarim, Neuroscience in Psychiatry Network (NSPN) Consortium, Bratislav Mišić, Jonathan Smallwood, Edward T. Bullmore, Boris C. Bernhardt

*†A complete list of investigators from the Neuroscience in Psychiatry Network (NSPN) Consortium can be found in the Supporting Information.*

Bo-yong Park  
Email: [boyong.park@inha.ac.kr](mailto:boyong.park@inha.ac.kr)  
Boris C. Bernhardt  
Email: [boris.bernhardt@mcgill.ca](mailto:boris.bernhardt@mcgill.ca)

### **This PDF file includes:**

Figures S1 to S12

### **Other supplementary materials for this manuscript include the following:**

Neuroscience in Psychiatry Network (NSPN) Consortium author list

**A. Yeo parcellation**

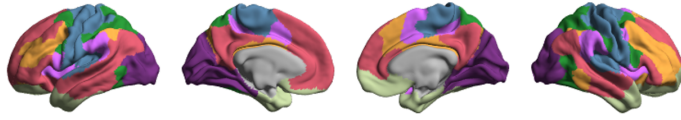

**B. Desikan-Killiany subparcellation**

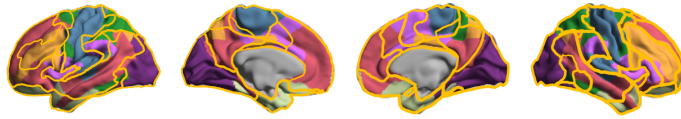

- Visual
- Somatomotor
- Dorsal attention
- Ventral attention
- Limbic
- Frontoparietal
- Default mode

**Fig. S1. Remapping of the Yeo-7 parcellation to the subparcellation of the Desikan-Killiany atlas used for this study. (A)** Intrinsic functional networks based on Yeo, Krienen, et al. (1). **(B)** Parcels of the 200 node Desikan-Killiany subparcellation were assigned to each of these networks, and the boundaries of the Yeo 7-networks are shown with lines.

**A. Age-effects on cortical thickness**

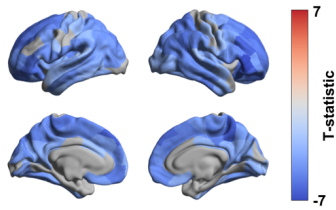

**B. Correlation between multiscale cortical structural differentiation and cortical thickness**

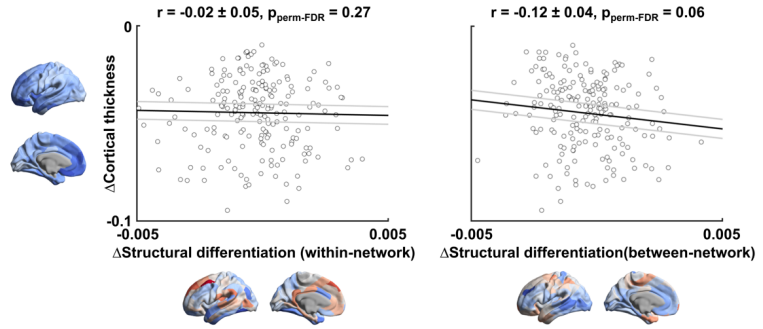

**Fig. S2. Cortical thickness effects. (A)** The t-statistics of the identified regions that showed significant age-related changes in cortical thickness. **(B)** Linear correlations between time-related changes in cortical thickness and within/between-network structural differentiation.

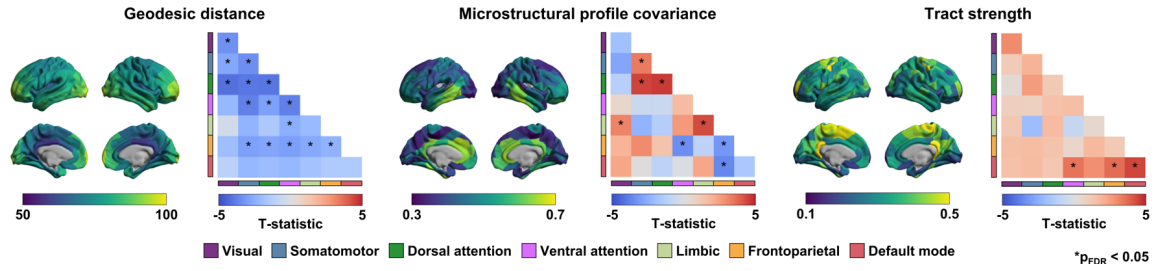

**Fig. S3. Age-effects on each cortical wiring feature.** The spatial maps of geodesic distance, microstructural profile covariance, and tract strength are shown on the brain surface. The t-statistics of age-related changes on each cortical feature within- and between-networks, with significant ( $p_{FDR} < 0.05$ ) results marked with asterisks. *Abbreviation:* FDR, false discovery rate.

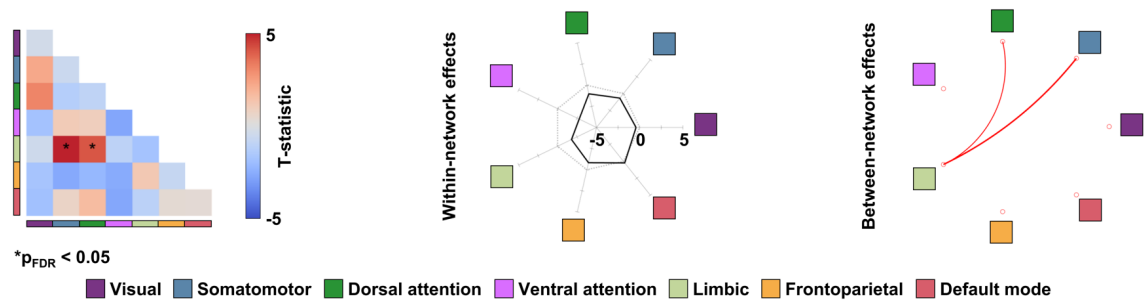

**Fig. S4. Age-effects on multiscale cortical structural differentiation after controlling for mean structural differentiation.** The t-statistics of age-effects are reported in the matrix, and within- and between-network effects are represented with radar and circular plots, respectively. For details, see *Fig. 1*.

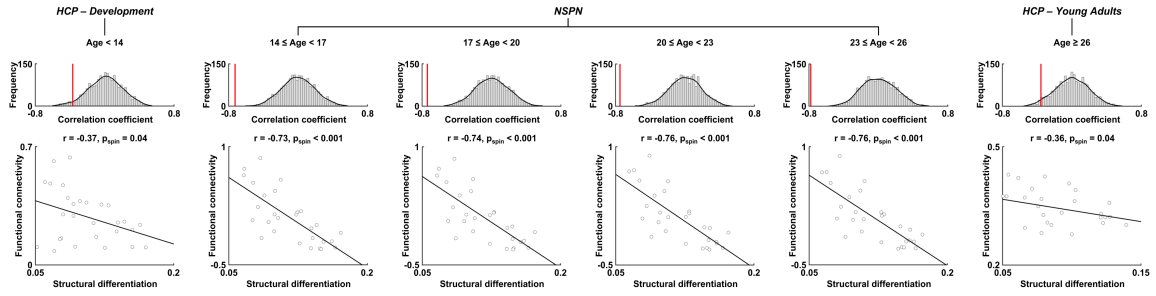

**Fig. S5. Association between functional connectivity and structural differentiation during development.** Cross-sectional structure-function coupling between functional connectivity and structural differentiation at different age bins. The histogram indicates a null distribution of correlation coefficients generated based on 1,000 spin tests, and the actual  $r$ -value is represented with a red bar.

A. Cross-sectional structure-function coupling at individual-level

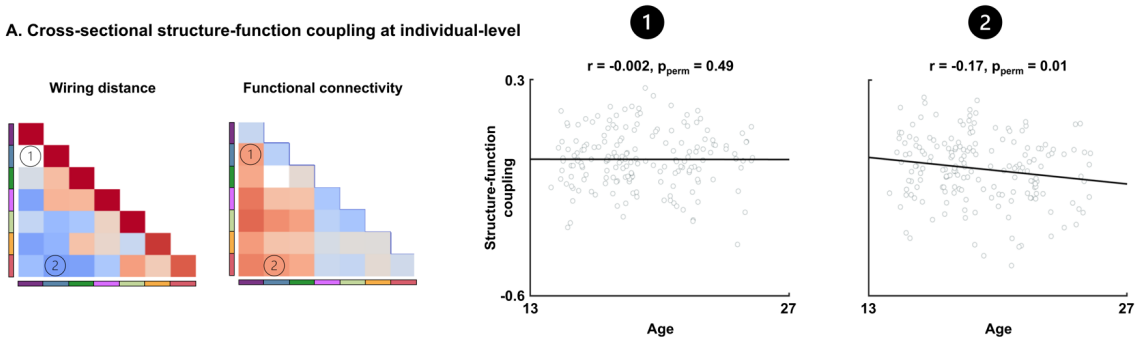

B. Longitudinal structure-function coupling at individual-level

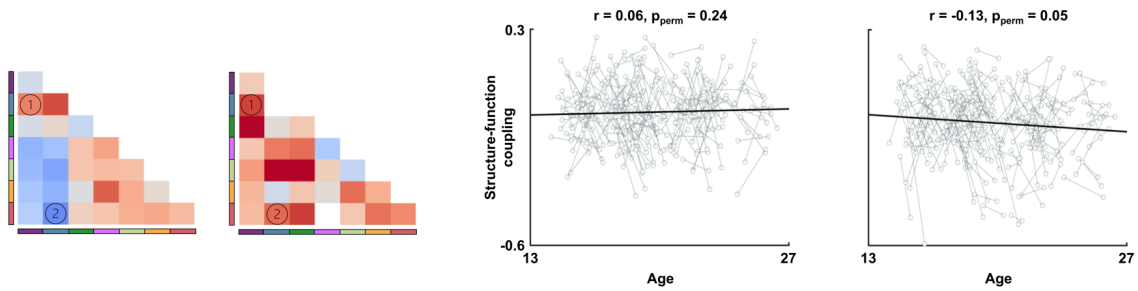

**Fig. S6. Inter-individual differences in structure-function coupling. (A)** The scatter plots show cross-sectional structure-function coupling between the connections that showed significant age-effects on both structural differentiation and functional connectivity, which are marked with 1 and 2. **(B)** We reported the results of longitudinal structure-function coupling.

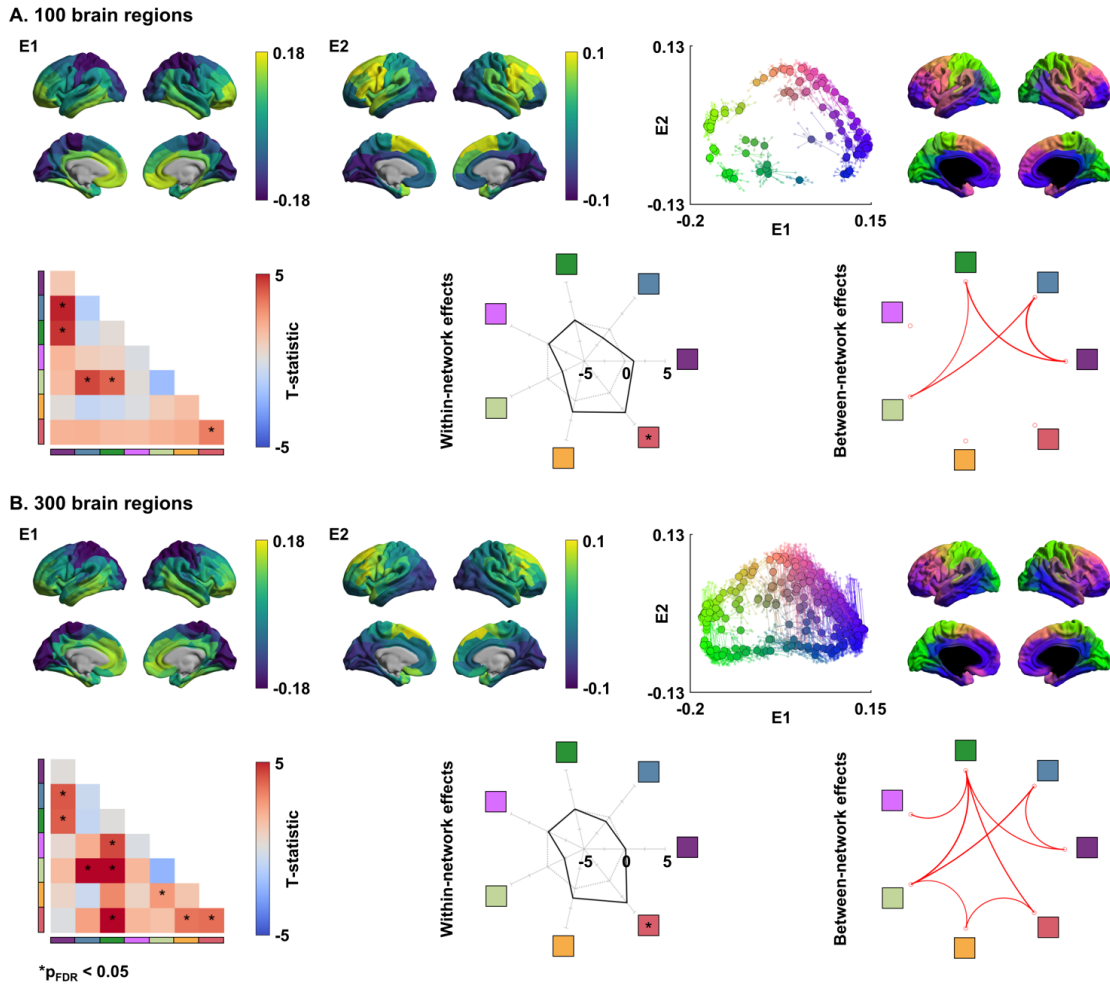

**Fig. S7. Structural eigenvectors and age-effects on multiscale cortical structural differentiation using different parcellation scales. (A)** Results using 100 and **(B)** 300 parcellations. Two eigenvectors (E1, E2) estimated from the cortical wiring features (top) and t-statistics of age-effects within- and between-networks (bottom) are reported. For details, see *Fig. 1*.



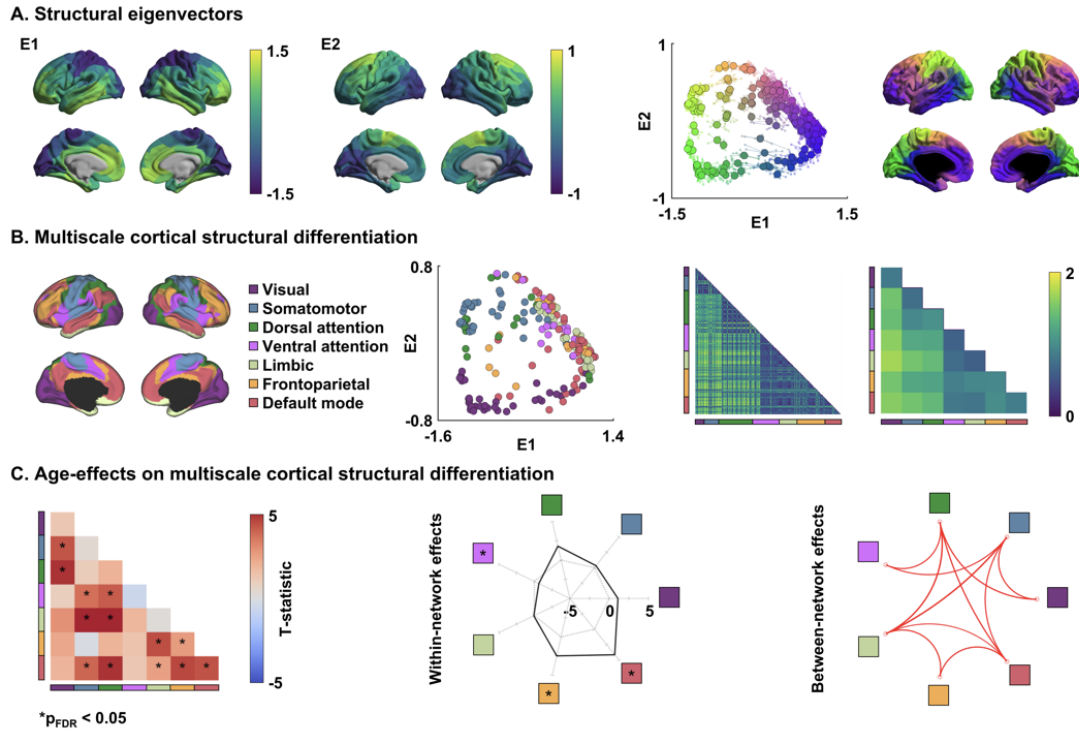

**Fig. S8. Structural eigenvectors derived using principal component analysis and age-effects on multiscale cortical structural differentiation. (A)** Two eigenvectors (E1, E2) estimated from the cortical wiring features. **(B)** The structural differentiation summarized based on functional communities. **(C)** The t-statistics of age-effects on structural differentiation within- and between-networks. For details, see *Fig. 1*.

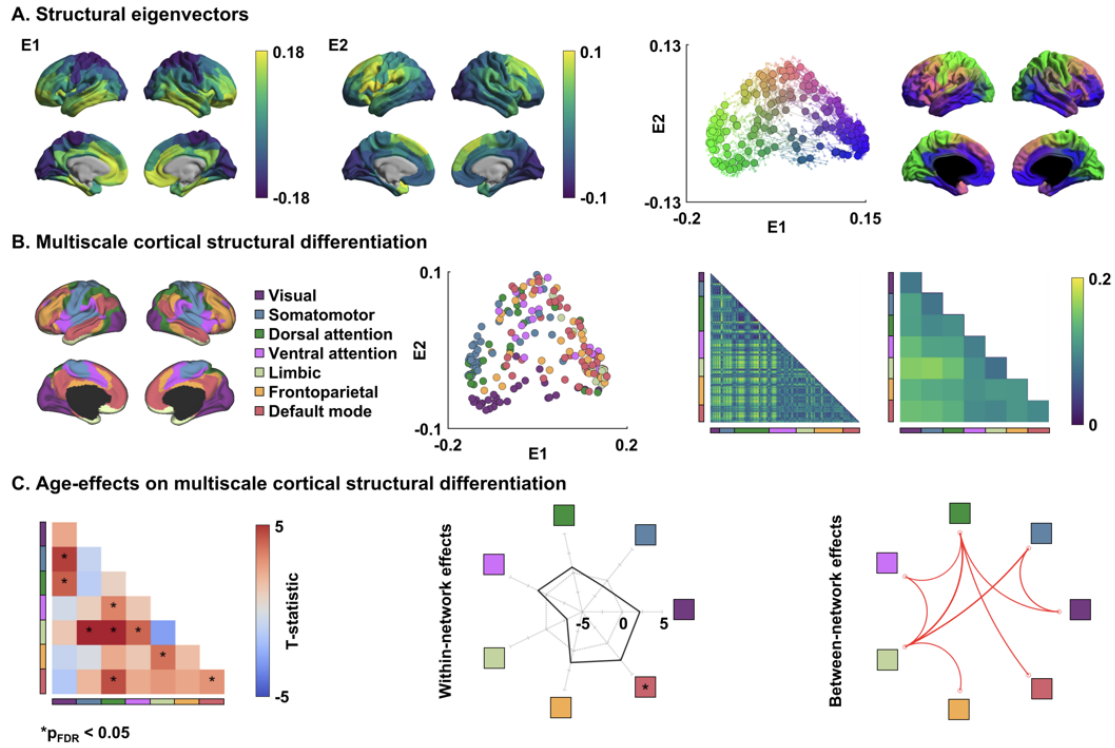

**Fig. S9. Structural eigenvectors and age-effects on multiscale cortical structural differentiation using Schaefer 200 parcellation.** (A) Two eigenvectors (E1, E2) estimated from the cortical wiring features. (B) The structural differentiation summarized based on functional communities. (C) The t-statistics of age-effects on structural differentiation within- and between-networks. For details, see Fig. 1.

**A. Age-effects on multiscale cortical structural differentiation of low head motion participants**

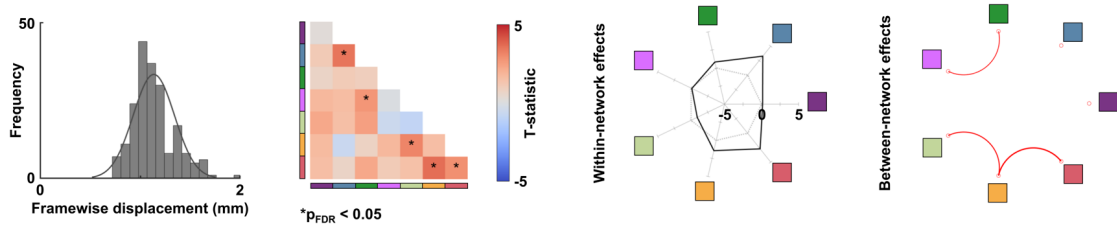

**B. Age-effects on functional connectivity of low head motion participants**

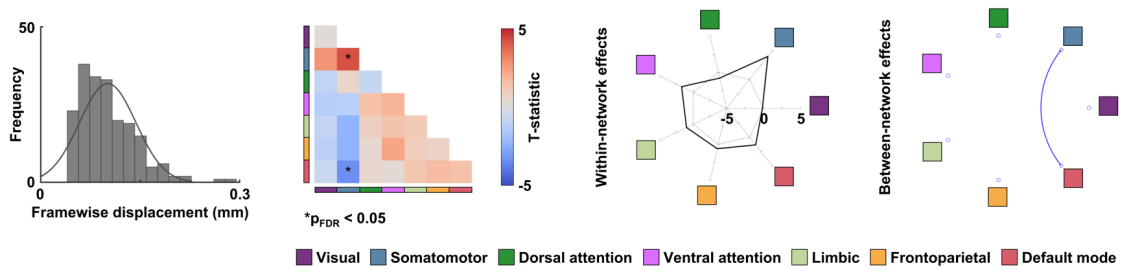

**Fig. S10. Age-effects on structural and functional measures based on participants with low head motion. (A) Age-effects on structural differentiation and (B) functional connectivity. The histograms indicate frequency of framewise displacement. For details, see Fig. 1 and 2.**

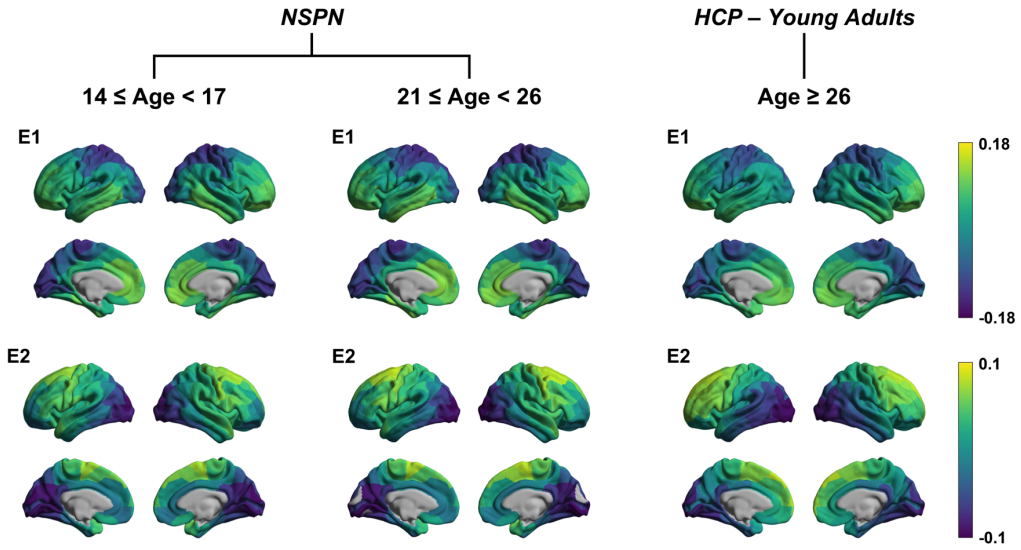

**Fig. S11. Structural eigenvectors of different age bins. We estimated two eigenvectors (E1, E2) from cortical wiring features using (A) younger (age < 17) and (B) older (age ≥ 21) adolescence from the *NSPN* dataset, and (C) those using the *HCP – Young Adults* dataset. Abbreviations: *NSPN*, the Neuroscience in Psychiatry Network; *HCP*, Human Connectome Project.**

### A. Schema of cell-types

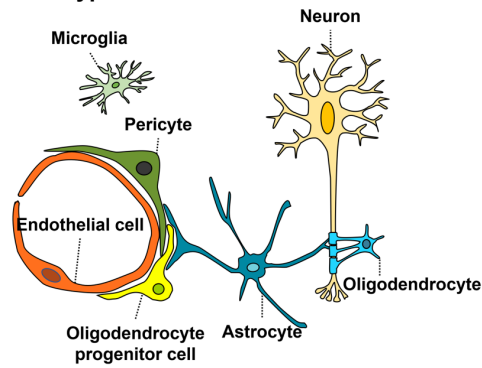

### B. Cell-type specific expression analysis

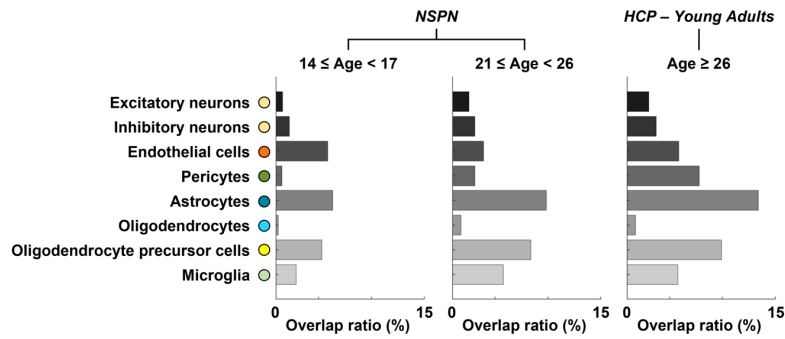

**Fig. S12. Transcriptomic analysis.** (A) Schema of different cell types and (B) overlap ratio between cell-type specific genes and the genes associated with multiscale cortical wiring of younger (age < 17) and older (age ≥ 21) adolescence from the NSPN dataset, and young healthy adults from the HCP – Young Adults database. Abbreviations: NSPN, the Neuroscience in Psychiatry Network; HCP, Human Connectome Project.

## Neuroscience in Psychiatry Network (NSPN) Consortium author list

### Principal investigators:

Edward Bullmore (CI from 01/01/2017)<sup>1,2,3</sup>; Raymond Dolan<sup>4,5</sup>; Ian Goodyer (CI until 01/01/2017)<sup>1</sup>; Peter Fonagy<sup>6</sup>; Peter Jones<sup>1</sup>

### NSPN (funded) staff:

Michael Moutoussis<sup>4,5</sup>; Tobias Hauser<sup>4,5</sup>; Sharon Neufeld<sup>1</sup>; Rafael Romero-Garcia<sup>1,2</sup>; Michelle St Clair<sup>1</sup>; Petra Vértes<sup>1,2</sup>; Kirstie Whitaker<sup>1,2</sup>; Becky Inkster<sup>1</sup>; Gita Prabhu<sup>4,5</sup>; Cinly Ooi<sup>1</sup>; Umar Toseeb<sup>1</sup>; Barry Widmer<sup>1</sup>; Junaid Bhatti<sup>1</sup>; Laura Willis<sup>1</sup>; Ayesha Alrumaithi<sup>1</sup>; Sarah Birt<sup>1</sup>; Aislinn Bowler<sup>5</sup>; Kalia Cleridou<sup>5</sup>; Hina Dadabhoy<sup>5</sup>; Emma Davies<sup>1</sup>; Ashlyn Firkins<sup>1</sup>; Sian Granville<sup>5</sup>; Elizabeth Harding<sup>5</sup>; Alexandra Hopkins<sup>4,5</sup>; Daniel Isaacs<sup>5</sup>; Janchai King<sup>5</sup>; Danae Kokorikou<sup>5,6</sup>; Christina Maurice<sup>1</sup>; Cleo McIntosh<sup>1</sup>; Jessica Memarzia<sup>1</sup>; Harriet Mills<sup>5</sup>; Ciara O'Donnell<sup>1</sup>; Sara Pantaleone<sup>5</sup>; Jenny Scott<sup>1</sup>; Beatrice Kiddle<sup>1</sup>; Ela Polek<sup>1</sup>

### Affiliated scientists:

Pasco Fearon<sup>6</sup>; John Suckling<sup>1</sup>; Anne-Laura van Harmelen<sup>1</sup>; Rogier Kievit<sup>4,7</sup>; Sam Chamberlain<sup>1</sup>

<sup>1</sup>*Department of Psychiatry, University of Cambridge, United Kingdom*

<sup>2</sup>*Behavioural and Clinical Neuroscience Institute, University of Cambridge, United Kingdom*

<sup>3</sup>*ImmunoPsychiatry, GlaxoSmithKline Research and Development, United Kingdom*

<sup>4</sup>*Max Planck University College London Centre for Computational Psychiatry and Ageing Research, University College London, UK*

<sup>5</sup>*Wellcome Centre for Human Neuroimaging, University College London, United Kingdom*

<sup>6</sup>*Research Department of Clinical, Educational and Health Psychology, University College London, United Kingdom*

<sup>7</sup>*Medical Research Council Cognition and Brain Sciences Unit, University of Cambridge, United Kingdom*

### SI References

1. B. T. T. Yeo, *et al.*, The organization of the human cerebral cortex estimated by intrinsic functional connectivity. *J. Neurophysiol.* **106**, 1125–1165 (2011).
